# Supplementary material
Source: PubMed Central journal article supplement (PMC6536846)
Supplement: awz085_supplementary_data.pdf [file awz085_supplementary_data.pdf]

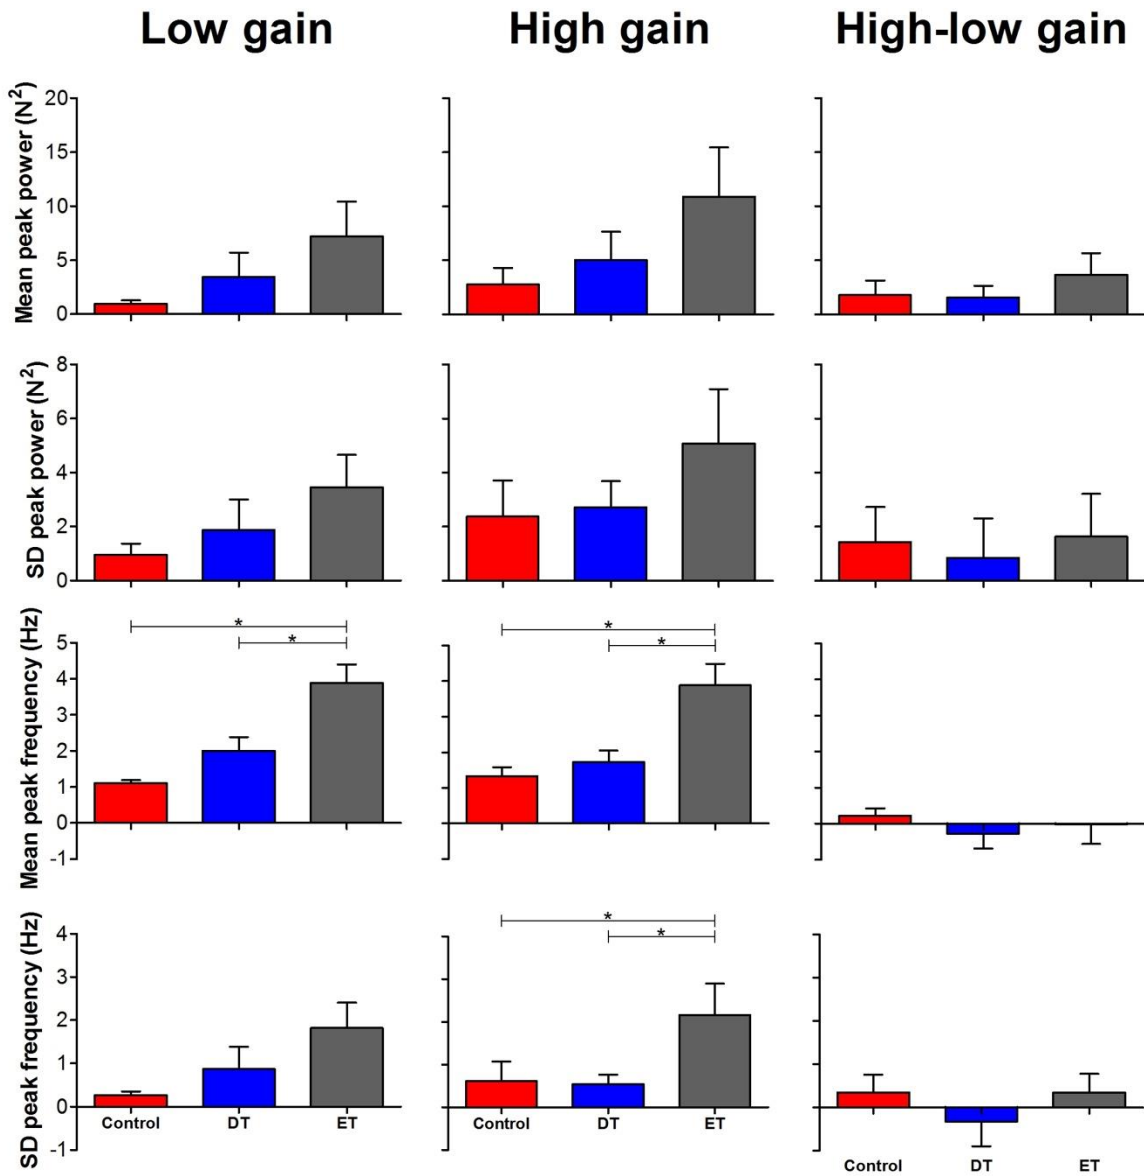

**Supplementary Figure 1. Mean and standard deviation of peak force power and frequency.** Average group values for mean and standard deviation (SD) of peak force power and frequency for control (red), dystonic tremor (DT: blue), and essential tremor (ET: grey) groups in the low (left panel), high (middle panel), and high minus low (right panel) visual feedback tasks. Error bars represent standard error of the mean. Asterisks denote a significant increase in mean peak force frequency in ET compared to control and DT groups ( $P < 0.05$  FDR-corrected).

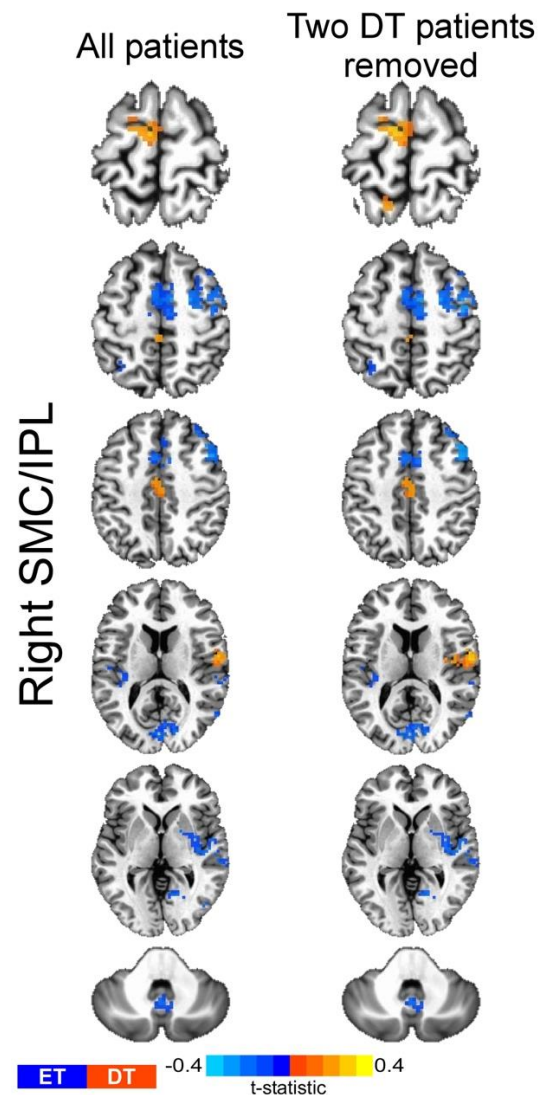

**Supplementary Figure 2. DT versus ET right SMC/IPL  $FC_{\Delta}$  with and without two DT subjects.** Axial slice representation of whole-brain  $t$ -statistical maps of the mean difference in right SMC/IPL  $FC_{\Delta}$  for the dystonic tremor (DT) versus essential tremor (ET) comparison. The left panel represents all patients included in the original analysis as depicted in Figure 6A. The right panel represents all patients except for two DT patients who exhibited higher head motion than other patients (although it is important to note that head motion of these two patients was still within acceptable range). Positive (red-orange) clusters denote significantly increased  $FC_{\Delta}$  with the seed ROI in the DT group compared to ET group, whereas negative (blue) clusters denote significantly reduced  $FC_{\Delta}$  with the seed ROI in the DT group compared to ET group ( $P < 0.05$  FWER-corrected).

| Region(s)                                      | Effect       | Hemisphere    | Size (mm <sup>3</sup> ) | Peak t-statistic | MNI CoM |    |    | Mean BOLD <sub>Δ</sub> |             |              |
|------------------------------------------------|--------------|---------------|-------------------------|------------------|---------|----|----|------------------------|-------------|--------------|
|                                                |              |               |                         |                  | x       | y  | z  | Control                | DT          | ET           |
| cuneus                                         | control > ET | ipsilateral   | 891                     | 3.02             | 3       | 88 | 5  | 0.5 (0.47)             | 0.3 (0.44)  | 0.17 (0.42)  |
| cerebellum (I-IV)                              | control > ET | ipsilateral   | 837                     | 4.35             | 6       | 45 | 19 | 0.25 (0.58)            | 0.04 (0.56) | 0.03 (0.53)  |
| superior parietal lobule                       | control > ET | ipsilateral   | 675                     | 3.75             | 10      | 47 | 59 | 0.34 (0.23)            | 0.34 (0.34) | 0.15 (0.21)  |
| inferior occipital gyrus                       | control > ET | ipsilateral   | 378                     | 3.7              | 26      | 89 | 12 | 0.59 (0.49)            | 0.22 (0.68) | 0.19 (0.36)  |
| middle temporal gyrus                          | control > ET | ipsilateral   | 351                     | 3.44             | 54      | 47 | 5  | 0.36 (0.33)            | 0.12 (0.41) | 0.14 (0.33)  |
| inferior parietal lobule                       | control > ET | ipsilateral   | 270                     | 3.42             | 33      | 43 | 59 | 0.28 (0.18)            | 0.42 (0.32) | 0.13 (0.2)   |
| middle frontal gyrus                           | control > ET | ipsilateral   | 243                     | 3.2              | 44      | 12 | 39 | 0.49 (0.23)            | 0.17 (0.3)  | 0.002 (0.26) |
| cerebellum (VI)                                | control > ET | ipsilateral   | 216                     | 4.07             | 34      | 44 | 27 | 0.57 (0.33)            | 0.23 (0.37) | 0.02 (0.3)   |
| lingual gyrus                                  | control > ET | contralateral | 432                     | 3.62             | 11      | 90 | 8  | 0.4 (0.35)             | 0.36 (0.49) | 0.21 (0.37)  |
| cerebellum (VIIIb)                             | control > ET | contralateral | 297                     | 3.38             | 22      | 54 | 46 | 0.34 (0.24)            | 0.17 (0.29) | 0.04 (0.2)   |
| middle frontal gyrus                           | control > DT | ipsilateral   | 1,161                   | 4.42             | 38      | 24 | 31 | 0.51 (0.34)            | 0.01 (0.33) | 0.36 (0.38)  |
| cerebellum (I-IV)                              | control > DT | ipsilateral   | 243                     | 3.83             | 6       | 50 | 26 | 0.34 (0.28)            | 0.03 (0.24) | 0.16 (0.21)  |
| cingulate gyrus*, medial frontal gyrus         | control > DT | contralateral | 243                     | 3.9              | 11      | 39 | 20 | 0.15 (0.21)            | 0.29 (0.24) | 0.1 (0.25)   |
| insula                                         | DT > ET      | ipsilateral   | 864                     | 3.72             | 40      | 19 | 21 | 0.05 (0.3)             | 0.22 (0.33) | 0.3 (0.34)   |
| sensorimotor cortex*, inferior parietal lobule | DT > ET      | ipsilateral   | 837                     | 3.33             | 45      | 39 | 60 | 0.19 (0.29)            | 0.38 (0.36) | 0.16 (0.3)   |
| cingulate gyrus*, mesial premotor cortex       | DT > ET      | ipsilateral   | 675                     | 3.93             | 5       | 8  | 46 | 0.36 (0.31)            | 0.48 (0.4)  | 0.01 (0.24)  |
| inferior parietal lobule                       | DT > ET      | ipsilateral   | 378                     | 3.46             | 51      | 40 | 30 | 0.03 (0.28)            | 0.14 (0.26) | 0.34 (0.3)   |
| middle frontal gyrus                           | ET > DT      | ipsilateral   | 243                     | -3.79            | 43      | 27 | 30 | 0.51 (0.3)             | 0.01 (0.27) | 0.67 (0.33)  |
| lingual gyrus                                  | DT > ET      | contralateral | 459                     | 3.79             | 15      | 88 | 16 | 0.61 (0.78)            | 0.96 (0.94) | 0.39 (1.06)  |

**Supplementary Table 1. BOLD<sub>Δ</sub> between-group effects.** Between-group BOLD<sub>Δ</sub> effects decomposed by significant regional cluster(s), direction of the effect, cluster hemisphere relative to the effector limb, cluster size (mm<sup>3</sup>), peak cluster t-statistic, peak cluster center-of-mass (CoM) MNI coordinates, and group mean (±SD) BOLD<sub>Δ</sub> score. All clusters are significant at  $P < 0.005$  ( $P < 0.05$  FWER-corrected). Region of peak  $t$ -statistic is noted with an asterisk for multi-cluster combinations.

| <b>Left SMC/IPL FCA</b>  |                   |                                                                                                                                                                                                                                                                 |                   |               |
|--------------------------|-------------------|-----------------------------------------------------------------------------------------------------------------------------------------------------------------------------------------------------------------------------------------------------------------|-------------------|---------------|
| <b>Cluster No.</b>       | <b>Hemisphere</b> | <b>Region(s)</b>                                                                                                                                                                                                                                                | <b>Size (mm3)</b> | <b>Effect</b> |
| <b>DT versus Control</b> |                   |                                                                                                                                                                                                                                                                 |                   |               |
| 1                        | bilateral         | cuneus                                                                                                                                                                                                                                                          | 9,072             | control > DT  |
| 2                        | bilateral         | superior parietal lobule*, cingulate gyrus                                                                                                                                                                                                                      | 6,750             | control > DT  |
| 3                        | bilateral         | sensorimotor cortex*, supplementary motor area , mesial premotor cortex, cingulate gyrus                                                                                                                                                                        | 6,480             | control > DT  |
| 4                        | ipsilateral       | lingual gyrus* middle occipital gyrus, cerebellum (VI, crus I, vermis, interposed, dentate)                                                                                                                                                                     | 6,399             | control > DT  |
| 5                        | bilateral         | cuneus*, superior parietal lobule, cingulate gyrus                                                                                                                                                                                                              | 3,645             | control > DT  |
| 6                        | ipsilateral       | middle frontal gyrus*, lateral premotor cortex, sensorimotor cortex                                                                                                                                                                                             | 3,042             | control > DT  |
| 7                        | contralateral     | lingual gyrus                                                                                                                                                                                                                                                   | 2,754             | control > DT  |
| 8                        | ipsilateral       | superior parietal lobule*, inferior parietal lobule                                                                                                                                                                                                             | 1,971             | control > DT  |
| 9                        | ipsilateral       | inferior parietal lobule                                                                                                                                                                                                                                        | 1,539             | control > DT  |
| 10                       | contralateral     | middle temporal gyrus*, middle occipital gyrus                                                                                                                                                                                                                  | 1,242             | control > DT  |
| 11                       | ipsilateral       | middle occipital gyrus*, middle temporal gyrus                                                                                                                                                                                                                  | 1,161             | control > DT  |
| 12                       | ipsilateral       | insula*, putamen, globus pallidus                                                                                                                                                                                                                               | 1,080             | control > DT  |
| 13                       | contralateral     | cerebellum (VIIIa*, VIIIb)                                                                                                                                                                                                                                      | 783               | control > DT  |
| 14                       | contralateral     | middle frontal gyrus                                                                                                                                                                                                                                            | 756               | DT > control  |
| 15                       | ipsilateral       | superior frontal gyrus                                                                                                                                                                                                                                          | 702               | control > DT  |
| <b>ET versus control</b> |                   |                                                                                                                                                                                                                                                                 |                   |               |
| 1                        | contralateral     | superior temporal gyrus                                                                                                                                                                                                                                         | 1,350             | control > ET  |
| 2                        | contralateral     | lateral premotor cortex                                                                                                                                                                                                                                         | 1,026             | ET > control  |
| 3                        | contralateral     | middle frontal gyrus                                                                                                                                                                                                                                            | 783               | control > ET  |
| 4                        | contralateral     | superior parietal lobule                                                                                                                                                                                                                                        | 729               | control > ET  |
| 5                        | contralateral     | sensorimotor cortex*, mesial premotor cortex                                                                                                                                                                                                                    | 702               | control > ET  |
| <b>Right SMC/IPL FCA</b> |                   |                                                                                                                                                                                                                                                                 |                   |               |
| <b>Cluster No.</b>       | <b>Hemisphere</b> | <b>Region(s)</b>                                                                                                                                                                                                                                                | <b>Size (mm3)</b> | <b>Effect</b> |
| <b>DT versus Control</b> |                   |                                                                                                                                                                                                                                                                 |                   |               |
| 1                        | bilateral         | superior* and inferior parietal lobules, sensorimotor cortex, superior and middle temporal gyri, inferior frontal gyrus, putamen, middle occipital gyrus, cuneus, lingual gyrus, fusiform gyrus, cerebellum (V, VI, VIIb, VIIIa, VIIIb crus I, vermis, dentate) | 9,855             | control > DT  |
| 2                        | bilateral         | mesial premotor cortex*, supplementary motor area, cingulate gyrus                                                                                                                                                                                              | 8,532             | control > DT  |
| 3                        | ipsilateral       | lateral premotor cortex*, sensorimotor cortex                                                                                                                                                                                                                   | 4,185             | control > DT  |
| 4                        | bilateral         | cuneus*, superior parietal lobule, cingulate gyrus                                                                                                                                                                                                              | 2,511             | control > DT  |
| 5                        | contralateral     | sensorimotor cortex*, lateral premotor cortex                                                                                                                                                                                                                   | 1,890             | control > DT  |
| 6                        | contralateral     | putamen*, globus pallidus, insula                                                                                                                                                                                                                               |                   |               |

|                          |    |               |                                                      |       |              |
|--------------------------|----|---------------|------------------------------------------------------|-------|--------------|
|                          | 7  | ipsilateral   | cerebellum (VIIIa*, VIIIb, VIIb, crus II)            | 1,647 | control > DT |
|                          | 8  | contralateral | inferior* and superior parietal lobules              | 1,080 | control > DT |
|                          | 9  | bilateral     | cingulate gyrus                                      | 918   | control > DT |
|                          | 10 | ipsilateral   | middle frontal gyrus                                 | 810   | control > DT |
|                          | 11 | bilateral     | superior parietal lobule                             | 729   | control > DT |
| <b>ET versus control</b> |    |               |                                                      |       |              |
|                          | 1  | ipsilateral   | superior temporal gyrus*, middle temporal gyrus      | 5,049 | control > ET |
|                          | 2  | contralateral | sensorimotor cortex                                  | 3,348 | control > ET |
|                          | 3  | ipsilateral   | transverse temporal gyrus*, inferior parietal lobule | 3,267 | control > ET |
|                          | 4  | bilateral     | lingual gyrus*, cuneus                               | 1,593 | control > ET |
|                          | 5  | bilateral     | sensorimotor cortex*, mesial premotor cortex         | 1,350 | control > ET |
|                          | 6  | ipsilateral   | superior parietal lobule                             | 1026  | control > ET |
|                          | 7  | ipsilateral   | superior parietal lobule                             | 972   | control > ET |
|                          | 8  | contralateral | lateral premotor cortex                              | 837   | control > ET |
|                          | 9  | ipsilateral   | inferior parietal lobule                             | 783   | control > ET |
|                          | 10 | contralateral | putamen*, globus pallidus                            | 675   | control > ET |

**Supplementary Table 2. Patient versus control SMC/IPL FC<sub>Δ</sub> effects.** Significant patient (DT, ET) versus control FC<sub>Δ</sub> effects for left (top panel) and right (bottom panel) SMC/IPL ROIs. Regional clusters are decomposed by hemisphere relative to the seed ROI, cluster size (mm<sup>3</sup>), and direction of the effect. All clusters are significant at  $P < 0.005$  ( $P < 0.05$  FWER-corrected). Region of peak  $t$ -statistic is noted with an asterisk for multi-cluster combinations.

| Left GPi FC $\Delta$     |               |                                                |                         |              |
|--------------------------|---------------|------------------------------------------------|-------------------------|--------------|
| Cluster No.              | Hemisphere    | Region(s)                                      | Size (mm <sup>3</sup> ) | Effect       |
| <b>DT versus Control</b> |               |                                                |                         |              |
| 1                        | bilateral     | cerebellum (IX*, vermis, VIIIa)                | 1,647                   | control > DT |
| 2                        | bilateral     | precuneus                                      | 1,539                   | control > DT |
| 3                        | contralateral | superior frontal gyrus                         | 1,377                   | control > DT |
| 4                        | ipsilateral   | inferior parietal lobule                       | 1,350                   | DT > control |
| 5                        | bilateral     | cingulate gyrus                                | 864                     | control > DT |
| 6                        | ipsilateral   | insula                                         | 783                     | control > DT |
| 7                        | ipsilateral   | inferior parietal lobule                       | 756                     | control > DT |
| 8                        | contralateral | superior parietal lobule                       | 729                     | control > DT |
| <b>ET versus control</b> |               |                                                |                         |              |
| 1                        | contralateral | lateral premotor cortex                        | 756                     | control > ET |
| 2                        | ipsilateral   | inferior parietal lobule                       | 729                     | control > ET |
| Right GPi FC $\Delta$    |               |                                                |                         |              |
| Cluster No.              | Hemisphere    | Region(s)                                      | Size (mm <sup>3</sup> ) | Effect       |
| <b>DT versus Control</b> |               |                                                |                         |              |
| 1                        | ipsilateral   | insula*, putamen                               | 3,510                   | control > DT |
| 2                        | ipsilateral   | lateral premotor cortex                        | 2,889                   | control > DT |
| 3                        | ipsilateral   | precuneus                                      | 2,430                   | control > DT |
| 4                        | bilateral     | cerebellum (vermis*, VIIb, VIIIa, VIIIb)       | 2,439                   | control > DT |
| 5                        | ipsilateral   | middle frontal gyrus                           | 2,295                   | control > DT |
| 6                        | ipsilateral   | cerebellum (V*, VI, I-IV)                      | 2,160                   | control > DT |
| 7                        | bilateral     | cingulate gyrus                                | 2,079                   | control > DT |
| 8                        | bilateral     | cingulate gyrus*, supplementary motor area     | 1,971                   | control > DT |
| 9                        | bilateral     | precuneus*, cuneus                             | 1,431                   | control > DT |
| 10                       | ipsilateral   | inferior parietal lobule                       | 1,215                   | control > DT |
| 11                       | contralateral | lingual gyrus                                  | 918                     | control > DT |
| 12                       | bilateral     | thalamus                                       | 864                     | control > DT |
| 13                       | ipsilateral   | sensorimotor cortex*, inferior parietal lobule | 864                     | control > DT |
| 14                       | contralateral | medial frontal gyrus                           | 765                     | control > DT |
| <b>ET versus control</b> |               |                                                |                         |              |
| 1                        | ipsilateral   | supplementary motor area                       | 837                     | control > ET |
| 2                        | ipsilateral   | lateral premotor cortex                        | 783                     | control > ET |

**Supplementary Table 3. Patient versus control GPi FC $\Delta$  effects.** Significant patient (DT, ET) versus control FC $\Delta$  effects for left (top panel) and right (bottom panel) GPi ROIs. Regional clusters are decomposed by hemisphere relative to the seed ROI, cluster size (mm<sup>3</sup>), and direction of the effect. All clusters are significant at  $P < 0.005$  ( $P < 0.05$  FWER-corrected). Region of peak  $t$ -statistic is noted with an asterisk for multi-cluster combinations.

| <b>Left VIM FC<sub>Δ</sub></b>  |                   |                                                    |                              |                  |
|---------------------------------|-------------------|----------------------------------------------------|------------------------------|------------------|
| <b>Cluster No.</b>              | <b>Hemisphere</b> | <b>Region(s)</b>                                   | <b>Size (mm<sup>3</sup>)</b> | <b>Direction</b> |
| <b>DT versus Control</b>        |                   |                                                    |                              |                  |
| 1                               | bilateral         | medial* and superior frontal gyri                  | 1,701                        | control > DT     |
| 2                               | ipsilateral       | SMC*, inferior parietal lobule                     | 1,431                        | control > DT     |
| 3                               | contralateral     | parahippocampal gyrus*, lingual gyrus              | 1,242                        | control > DT     |
| 4                               | contralateral     | middle* and superior frontal gyri                  | 945                          | control > DT     |
| 5                               | ipsilateral       | middle frontal gyrus                               | 891                          | control > DT     |
| 6                               | contralateral     | cerebellum (VIIIa*, VIIb, VIIIb)                   | 810                          | control > DT     |
| 7                               | ipsilateral       | putamen*, globus pallidus                          | 702                          | control > DT     |
| <b>ET versus control</b>        |                   |                                                    |                              |                  |
| 1                               | contralateral     | middle frontal gyrus                               | 729                          | control > ET     |
| 2                               | contralateral     | superior temporal gyrus                            | 675                          | control > ET     |
| <b>Right VIM FC<sub>Δ</sub></b> |                   |                                                    |                              |                  |
| <b>Cluster No.</b>              | <b>Hemisphere</b> | <b>Region(s)</b>                                   | <b>Size (mm<sup>3</sup>)</b> | <b>Direction</b> |
| <b>DT versus Control</b>        |                   |                                                    |                              |                  |
| 1                               | ipsilateral       | middle* and superior frontal gyri                  | 3,726                        | control > DT     |
| 2                               | ipsilateral       | SMC*, inferior parietal lobule                     | 3,348                        | control > DT     |
| 3                               | contralateral     | inferior* and superior parietal lobules, precuneus | 2,511                        | control > DT     |
| 4                               | bilateral         | cingulate gyrus* precuneus                         | 2,322                        | control > DT     |
| 5                               | ipsilateral       | superior temporal gyrus*, superior marginal gyrus  | 2,025                        | control > DT     |
| 6                               | ipsilateral       | lingual gyrus                                      | 1,539                        | control > DT     |
| 7                               | ipsilateral       | putamen                                            | 1,188                        | control > DT     |
| 8                               | contralateral     | middle* and superior frontal gyri                  | 1,161                        | control > DT     |
| 9                               | ipsilateral       | precuneus, superior parietal lobule                | 999                          | control > DT     |
| 10                              | ipsilateral       | cerebellum (VI)                                    | 729                          | DT > control     |
| <b>ET versus control</b>        |                   |                                                    |                              |                  |
| 1                               | contralateral     | superior temporal gyrus                            | 2,916                        | control > ET     |
| 2                               | ipsilateral       | SMC*, inferior parietal lobule                     | 1,539                        | control > ET     |
| 3                               | ipsilateral       | inferior* and superior parietal lobules            | 1,269                        | control > ET     |
| 4                               | contralateral     | superior temporal gyrus                            | 1,242                        | control > ET     |
| 5                               | bilateral         | cingulate gyrus                                    | 1,161                        | control > ET     |
| 6                               | bilateral         | medial frontal gyrus                               | 1,026                        | ET > control     |
| 7                               | ipsilateral       | middle* and superior frontal gyri                  | 972                          | control > ET     |
| 8                               | bilateral         | cingulate gyrus                                    | 945                          | control > ET     |
| 8                               | ipsilateral       | middle frontal gyrus                               | 837                          | ET > control     |
| 9                               | ipsilateral       | middle frontal gyrus                               | 783                          | ET > control     |
| 10                              | contralateral     | middle frontal gyrus                               | 675                          | control > ET     |

**Supplementary Table 4. Patient versus control VIM FC<sub>Δ</sub> effects.** Significant patient (DT, ET)

versus control FC<sub>Δ</sub> effects for left (top panel) and right (bottom panel) VM ROIs. Regional clusters are

decomposed by hemisphere relative to the seed ROI, cluster size ( $\text{mm}^3$ ), and direction of the effect. All clusters are significant at  $P < 0.005$  ( $P < 0.05$  FWER-corrected). Region of peak  $t$ -statistic is noted with an asterisk for multi-cluster combinations.



| <b>Left DN FCA</b>       |                   |                                                                          |                              |               |
|--------------------------|-------------------|--------------------------------------------------------------------------|------------------------------|---------------|
| <b>Cluster No.</b>       | <b>Hemisphere</b> | <b>Region(s)</b>                                                         | <b>Size (mm<sup>3</sup>)</b> | <b>Effect</b> |
| <b>DT versus Control</b> |                   |                                                                          |                              |               |
| 1                        | bilateral         | cerebellum (I-IV*, V, VI), lingual gyrus                                 | 12,717                       | control > DT  |
| 2                        | bilateral         | cuneus*, cingulate gyrus                                                 | 4,509                        | control > DT  |
| 3                        | bilateral         | cerebellum (crus II*, dentate, VIIb, VIIIa, IX, crus I, vermis)          | 2,943                        | control > DT  |
| 4                        | bilateral         | mesial premotor cortex                                                   | 1,944                        | control > DT  |
| 5                        | contralateral     | sensorimotor cortex*, inferior parietal lobule                           | 1,917                        | control > DT  |
| 6                        | contralateral     | inferior parietal lobule                                                 | 1,620                        | control > DT  |
| 7                        | bilateral         | superior parietal lobule                                                 | 1,296                        | control > DT  |
| 8                        | ipsilateral       | superior frontal gyrus                                                   | 1,134                        | control > DT  |
| 9                        | ipsilateral       | middle occipital gyrus                                                   | 756                          | control > DT  |
| 10                       | ipsilateral       | middle occipital gyrus                                                   | 729                          | control > DT  |
| 11                       | ipsilateral       | superior temporal gyrus                                                  | 729                          | DT > control  |
| <b>ET versus control</b> |                   |                                                                          |                              |               |
| 1                        | bilateral         | cerebellum (VI*, I-IV, V)                                                | 2,700                        | control > ET  |
| 2                        | bilateral         | cerebellum (vermis*, VIIb, VIIIa, VIIIb, IX, crus II)                    | 2,268                        | control > ET  |
| 3                        | contralateral     | lateral premotor cortex                                                  | 756                          | control > ET  |
| <b>Right DN FCA</b>      |                   |                                                                          |                              |               |
| <b>Cluster No.</b>       | <b>Hemisphere</b> | <b>Region(s)</b>                                                         | <b>Size (mm<sup>3</sup>)</b> | <b>Effect</b> |
| <b>DT versus Control</b> |                   |                                                                          |                              |               |
| 1                        | bilateral         | cerebellum (I-IV*, V, VI, vermis), lingual gyrus                         | 11,232                       | control > DT  |
| 2                        | ipsilateral       | inferior parietal lobule                                                 | 4,428                        | control > DT  |
| 3                        | ipsilateral       | sensorimotor cortex*, superior parietal lobule, inferior parietal lobule | 3,240                        | control > DT  |
| 4                        | bilateral         | cuneus*, cingulate gyrus                                                 | 3,213                        | control > DT  |
| 5                        | ipsilateral       | middle temporal gyrus*, superior temporal gyrus                          | 2,403                        | control > DT  |
| 6                        | ipsilateral       | cerebellum (VIIIa*, VIIb, VIIIb, IX)                                     | 1,836                        | control > DT  |
| 7                        | bilateral         | superior parietal lobule                                                 | 1,269                        | control > DT  |
| 8                        | ipsilateral       | mesial premotor cortex                                                   | 1,242                        | control > DT  |
| 9                        | contralateral     | insula*, lateral premotor cortex                                         | 1,188                        | control > DT  |
| 10                       | bilateral         | superior parietal lobule*, cingulate gyrus                               | 1,188                        | control > DT  |
| 11                       | contralateral     | cerebellum (crus II*, vermis, VI)                                        | 918                          | control > DT  |
| 12                       | contralateral     | middle occipital lobule*, middle temporal lobule                         | 918                          | control > DT  |
| 13                       | bilateral         | thalamus*                                                                | 783                          | control > DT  |
| <b>ET versus control</b> |                   |                                                                          |                              |               |
| 1                        | contralateral     | cerebellum (V*, I-IV)                                                    | 2,457                        | control > ET  |
| 2                        | ipsilateral       | inferior parietal lobule                                                 | 2,187                        | control > ET  |
| 3                        | contralateral     | lingual gyrus                                                            | 1,863                        | control > ET  |
| 4                        | ipsilateral       | superior parietal lobule*, inferior parietal lobule                      | 1,377                        | control > ET  |
| 5                        | bilateral         | cerebellum (crus II*, VI, vermis)                                        | 1,296                        | control > ET  |
| 6                        | contralateral     | middle occipital gyrus*, middle temporal gyrus                           | 945                          | control > ET  |
| 7                        | contralateral     | middle frontal gyrus                                                     | 891                          | ET > control  |
| 8                        | ipsilateral       | cuneus                                                                   | 783                          | control > ET  |
| 9                        | contralateral     | putamen*, insula                                                         | 729                          | ET > control  |

**Supplementary Table 5. Patient versus control DN FC<sub>Δ</sub> effects.** Significant patient (DT, ET) versus control FC<sub>Δ</sub> effects for left (top panel) and right (bottom panel) DN ROIs. Regional clusters are decomposed by hemisphere relative to the seed ROI, cluster size (mm<sup>3</sup>), and direction of the effect. All clusters are significant at  $P < 0.005$  ( $P < 0.05$  FWER-corrected). Region of peak  $t$ -statistic is noted with an asterisk for multi-cluster combinations.

| <b>Logistic regression</b>               | <b>F-statistics (Wald)</b>   |              |                                    | <b>P-values</b>              |              |                                    |
|------------------------------------------|------------------------------|--------------|------------------------------------|------------------------------|--------------|------------------------------------|
| <b>Variable</b>                          | <b>FC<math>\Delta</math></b> | <b>Force</b> | <b>FC<math>\Delta</math>+Force</b> | <b>FC<math>\Delta</math></b> | <b>Force</b> | <b>FC<math>\Delta</math>+Force</b> |
| Spectral power $\Delta$ 0-3 Hz           | -                            | 1.773        | 0.223                              | -                            | 0.183        | 0.637                              |
| Spectral power $\Delta$ 4-12 Hz          | -                            | 2.524        | 0.199                              | -                            | 0.112        | 0.656                              |
| SD Peak Frequency $\Delta$               | -                            | 1.994        | 4.83                               | -                            | 0.158        | 0.028                              |
| Left SMC/IPL FC $\Delta$                 | 5.124                        | -            | 4.205                              | 0.024                        | -            | 0.04                               |
| Right SMC/IPL FC $\Delta$                | 0.166                        | -            | 0.148                              | 0.684                        | -            | 0.7                                |
| Left GPi FC $\Delta$                     | 1.394                        | -            | 2.103                              | 0.238                        | -            | 0.147                              |
| Right GPi FC $\Delta$                    | 1.773                        | -            | 2.605                              | 0.183                        | -            | 0.107                              |
| Left VIM FC $\Delta$                     | 0.514                        | -            | 1.281                              | 0.473                        | -            | 0.258                              |
| Right VIM FC $\Delta$                    | 0.094                        | -            | 0.048                              | 0.76                         | -            | 0.826                              |
| Left DN FC $\Delta$                      | 1.546                        | -            | 1.069                              | 0.214                        | -            | 0.301                              |
| Right DN FC $\Delta$                     | 0.261                        | -            | 0.441                              | 0.61                         | -            | 0.507                              |
| <b>LOOCV MSE</b>                         | <b>0.29</b>                  | <b>0.402</b> | <b>0.343</b>                       | <b>0.29</b>                  | <b>0.402</b> | <b>0.343</b>                       |
| <b>Forward selection (best variable)</b> | <b>F-statistics (Wald)</b>   |              |                                    | <b>P-values</b>              |              |                                    |
| Left SMC/IPL FC $\Delta$                 | 8.463                        | -            | -                                  | 0.004                        | -            | -                                  |
| <b>LOOCV MSE</b>                         | <b>0.189</b>                 | -            | -                                  | <b>0.189</b>                 | -            | -                                  |

**Supplementary Table 6. Logistic regression model with leave-one-out cross-validation approach.** F-statistics of the binary logistic regression model and associated p-values for individual predictors of patient group (dystonic tremor, essential tremor) shown for force variables (spectral power $\Delta$  0-3 Hz and 4-12 Hz, standard deviation of peak force frequency $\Delta$ ), FC $\Delta$  variables (average z-scores in the high minus low feedback task for all eight seed regions-of-interest), and combined force and FC $\Delta$  variables. Forward selection determined that functional connectivity z-scores for the left SMC/IPL seed was the best individual predictor of patient cohort. The mean square error (MSE) values for leave-one-out cross-validation (LOOCV) of the logistic regression and forward selection are shown.
